# Supplementary material for: Assessing the Prevalence of Maternal Mental Health Disorders Between Six Weeks and Six Months Postpartum—A Scoping Review
Source: Research Square preprint supplement (doi:10.21203/rs.3.rs-7907843/v1), 2025-11-13
Supplement: Supplementary file 1 [file 73b89862a95d1773613d27ea.docx]

**Supplementary Material 1**

**Table 1. Embase Search String**

|  | **Search term** | **Variations of search terms** | **Field** |
| --- | --- | --- | --- |
|  | Postpartum depression | *('postnatal depression'/exp OR (('postpartum':ti,ab,kw OR 'postnatal':ti,ab,kw OR 'post-partum':ti,ab,kw OR 'post-natal':ti,ab,kw) AND 'depress*':ti,ab,kw))* | Emtree; Title/abstract/ keyword |
| AND | Incidence/  prevalence | *('incidence':ti,ab,kw OR 'prevalence':ti,ab,kw OR 'diagnos*':ti,ab,kw OR 'treat*':ti,ab,kw OR 'screen*':ti,ab,kw)* | Title/abstract/ keyword |
| AND | Clinical inquiry | *[clinical study]/lim* | Filter |
| AND | Article criteria | *English*  *Past 5 years (2019-2024)*  *Not Medline results*  *No conference abstracts* | Filter |

**Table 2. CINHAL Search String**

|  | **Search term** | **Variations of search terms** | **Field** |
| --- | --- | --- | --- |
|  | Postpartum depression | *(("depression, postpartum") OR (("postpartum" OR "postnatal" OR "post-partum" OR "post-natal") AND depress*))* | Title/abstract/ subject |
| AND | Incidence/  prevalence | *("incidence" OR "prevalence" OR diagnos* OR treat* OR screen*)* | Title/abstract/ subject |
| AND | Clinical inquiry (filter) | *clinical queries (therapy, high sensitivity)* | Filter |
| AND | Article criteria (filter) | *English*  *Past 5 years (2019-20240*  *Exclude Medline*  *Full-text* | Filter |

**Supplementary Material 2**

| **Author, Year** | **Country** | **Country income level** | **Study design** | **Summary of exclusion criteria** | **Summary of included sample** | **Conditions** | **Screening tools** | **Cut-off scores or diagnostic criteria** | **Postpartum measurement period** | **Sample size** | **n (%)** |
| --- | --- | --- | --- | --- | --- | --- | --- | --- | --- | --- | --- |
| Abenova et al., 2022 | Kazakhstan | Upper MIC | Cross-sectional | Could not communicate verbally; suffered  complete loss of hearing; mental illness; intrauterine fetal death | Women whose last child was 3 < 6 months old | Depression | EPDS | ³10 | 3-6 months | 70 | 44 (62.9%) |
| Adeyemo et al., 2020 | Nigeria | Lower MIC | Cross-sectional | None reported (NR) | Mothers attending infant immunization clinics | Depression | EPDS | ³13 | 6 weeks | 250 | 89 (36.5%) |
| Agler et al., 2021 | Democratic Republic of the Congo | LIC | Experimental | NR | Women who received standard of care after giving birth | Depression | EPDS | 13 or higher; >13 | 14 weeks | 246 | 45 (18%) |
| Ahmad et al., 2023 | Saudi Arabia | HIC | Cohort | Previous diagnosis of psychiatric illness; non-Arab speakers | Mothers who had a spontaneous vaginal delivery | Depression | EPDS | ³10 | 6 weeks | 91 | 35 (38.5%) |
| Alhusaini et al., 2022 | Saudi Arabia | HIC | Cross-sectional | NR | Mothers from the obstetrics inpatient ward | Depression | EPDS | ³13 | 6 weeks | 354 | 18 (5.1%) |
| Alloghani et al., 2024 | United Arab Emirates | HIC | Cross-sectional | With newborns identified with any congenital anomalies or critical illness; with any complications during pregnancy; a history of being diagnosed with any psychiatric disorder | Married Emirati women who had a singleton full-term pregnancy with the newborn 3-6 months old | Depression | EPDS | ³10 | 3-6 months | 26a | 13 (50%)a |
| Anju & Kaur, 2023 | India | Lower MIC | Cohort | NR | Postpartum patients | Depression | EPDS | More than or equal to 12 | 6 months | 102 | 16 (15.7%) |
| Arach et al., 2020 | Uganda | LIC | Cross-sectional | Lost their babies between 7–49 days postpartum | Mothers who gave birth at 28 weeks gestation or more | Depression | EPDS | ³14 | 50 days | 1789 | 377 (21.1%) |
| Arakawa et al., 2023 | Japan | HIC | Experimental | NR | Women who received usual care, who had a self-reported pregnancy, able to communicate in Japanese | Depression | EPDS | ³9 | 3 months | 329 | 75 (22.8%) |
| Ashenafi et al., 2021 | Ethiopia | LIC | Cross-sectional | Not permanently residing in the study sites | Married women (formally or informally) aged 15-49 living with the husband or partner | Depression | EPDS | ³13 | 6 weeks | 3015 | (16.3%)b |
| Atuhaire et al., 2023 | Uganda | LIC | Instrument validation | Lost their babies; sick with severe medical illness; personal/ family history of mood disorders | Mothers 18 to 49 years old who delivered a live baby and able to speak and understand Runyankore-Rukiga | Depression | EPDS | ³10 | 6 weeks | 287 | 82 (29.5%) |
| MINI | DSM-V | 6 weeks | 287 | 76 (26.5%) |
| Belete et al., 2020 | Ethiopia | LIC | Cross-sectional | Unable to communicate due to illness | Women 18 years old or older | Depression | EPDS | ³12 | 6-8 weeks | 988 | (33.8%)b |
| Çankaya, 2020 | Turkey | Upper MIC | Cohort | Multi-fetal pregnancies; high-risk pregnancies; perinatal death; stillbirth; postnatal complications, including postpartum psychiatric disorder | Women who were 18 years or over, married, primiparous, and having singleton pregnancy | Depression | EPDS | 13 or higher; >13 | 6-8 weeks | 245 | 44 (18%) |
| Chechko et al., 2022 | Germany | HIC | Cohort | Depression; severe birth/ pregnancy-related complications; alcoholism; psychotropic substance dependency or use during pregnancy; history of psychotic or manic episodes; antidepressant or antipsychotic medication during pregnancy | Postpartum women with healthy children | Adjustment disorder | DSM-V Clinical Interview | DSM-V | 12 weeks | 598 | 90 (15%) |
| Depression | DSM-V Clinical Interview | DSM-V | 12 weeks | 598 | 55 (9%) |
| Daliri et al., 2023 | Ghana | Lower MIC | Cross-sectional | Acutely ill; known mental health conditions; bereaved within the past  month | Women 6-8 weeks postpartum | Depression | EPDS | Above 11 | 6-8 weeks | 63 | 40 (63.5%) |
| Women 9-12 weeks postpartum | Depression | EPDS | Above 11 | 9-12 weeks | 35 | 7 (20%) |
| Dang et al., 2022 | Vietnam | Lower MIC | Cohort | Planning to migrate from the study area | Women 18 years old or older living in the selected wards for at least 6 months | Depression | PHQ-9 | 5 or higher | 3-5 months | 148 | 31 (20.9%) |
| Della Corte et al., 2022 | Italy | HIC | Cross-sectional | Past or actual major psychiatric disorder; brain disorder; history of substance/ alcohol abuse; intellectual disability | Women fluent in Italian with spontaneous birth of a singleton full-term healthy infant | Depression | EPDS | ³10; >10 | 3 months | 80 | 9 (11.3%) |
| Deng et al., 2021 | China | Upper MIC | Cohort | Age <18 years or >34 years; history of psychiatric disease; contraindications to neuraxial analgesia | Nulliparous women with single-term cephalic pregnancy delivering vaginally | Depression | EPDS | ³10 | 6 weeks | 577 | 100 (17.3%) |
| Ding et al., 2020 | China | Upper MIC | Cohort | Sought medical assistance for conception | Women at least 20 years of age, registered residents, conceived naturally | Depression | EPDS | ³10; 9/10 | 6 weeks | 2615 | 308 (11.8%) |
| Duan et al., 2021 | China | Upper MIC | Cohort | History of serious mental diseases; psychotropic drug utilization in past month; severe organ dysfunction; high surgical risk; life-threatening situation | Cesarean section patients with American Society of Anesthesiologists (ASA) grade II, at least 18 years old, able to communicate | Depression | EPDS | ³10 | 42 days | 568 | 103 (18.1%) |
| Eckerdal et al., 2020 | Sweden | HIC | Cohort | Elective cesarean delivery; multiparity; prematurity; preeclampsia; hypertension; induction of childbirth; breech position | Primiparous women who had spontaneous start of childbirth | Depression | EPDS | ³12 | 6 weeks | 1503 | 193 (13%) |
| Fairbrother et al., 2021 | Canada | HIC | Cohort | Less than 19 years old | English-speaking postpartum women | OCD | SCID-5 | DSM-V | 8 weeksd | 580c | (8.7%)b |
| 10 weeksd | 580c | (8.3%)b |
| 20 weeksd | 580c | (6.1%)b |
| 8 weeksd | 580c | (6%)b |
| 12 weeksd | 580c | (7%)b |
| 16 weeksd | 580c | (8%)b |
| 6 monthsd | 580c | (9%)b |
| 8.8 weeksd | 580c | (6.9%)b |
| 13 weeksd | 580c | (7.8%)b |
| Fritel et al., 2020 | France | HIC | Cohort | Twin pregnancy; known diabetes before pregnancy; inability to speak and read French; intention to move away from the region | Postpartum women with fecal incontinence | Depression | EPDS | ³10 | 4 months | 28 | 14 (50%) |
| Postpartum women with flatus-only incontinence | Depression | EPDS | ³10 | 4 months | 233 | 62 (26.6%) |
| Postpartum women with no anal incontinence | Depression | EPDS | ³10 | 4 months | 1353 | 233 (17.2%) |
| Froelinger et al., 2024 | France | HIC | Cohort | Risk of thrombosis or bleeding; history of epilepsy or seizure; poor comprehension of oral French | Women in labor aged >18 years who had a planned vaginal delivery of a live singleton fetus at 35 weeks of gestation | Depression | EPDS | ≥13 | 2 months | 2811 | 257 (9.1%) |
| ≥11 | 2 months | 2811 | 413 (14.7%) |
| Gan et al., 2019 | China | Upper MIC | Cohort | History of bipolar disorder, depression, schizophrenia or other psychotic illnesses | Women who were at least 20 years old, registered residents | Depression | EPDS | ³10; “more than 10” | 6 weeks | 2546 | 287 (11.4%) |
| George et al., 2022 | India | Lower MIC | Cohort | Known history of depression or previously diagnosed depression; seriously ill; not comprehend the questions | Postpartum women | Depression | EPDS | ≥13 | 6-8 weeks | 150 | 17 (11.3%) |
| Güneş, 2019 | Turkey | Upper MIC | Cross-sectional | Psychiatric disorder diagnosed in the prenatal period | Mothers at the health center | Depression | EPDS | 13 or higher | 2-6 months | 220 | 35 (15.9%) |
| Haga et al., 2019 | Norway | HIC | Experimental | NR | Control group of women at least 18 years of age, able to read and write Norwegian | Depression | EPDS | ³10 | 6 weeks | 531 | 94 (17.7%) |
| 3 months | 494 | 63 (12.8%) |
| 6 months | 466 | 55 (11.8%) |
| Harrison et al., 2023 | United Kingdom | HIC | Cross-sectional | NR | Women aged 16 years or older, living in England (2014 cohort) | Depression | EPDS | ≥13 | 3 months | 4568 | (10.3%)b |
| Women aged 16 years or older, living in England (2017 cohort) | Depression | EPDS | ≥13 | 6 months | 4509 | (16%)b |
| Women aged 16 years or older, living in England (2020 cohort) | Depression | EPDS | ≥13 | 6 months | 4611 | (23.9%)b |
| Haßdenteufel et al., 2021 | Germany | HIC | Cohort | Multiple pregnancy; known fetal anomalies/ malformation | Women aged >18 years, sufficient knowledge of the German language, and a singleton pregnancy | Depression | EPDS | ³10 | 3 months | 136 | 13 (9.6%) |
| 6 months | 136 | 18 (13.2%) |
| Herklots et al., 2023 | Tanzania | Lower MIC | Case-control | More than mild complications at the time of admission | Control group of women | Depression | PHQ-9 | ≥5 | 3 months | 138 | 12 (8.7%) |
| Depression | PHQ-9 | ≥10 | 3 months | 138 | 3 (2.2%) |
| PTSD | HTQ-16 | ≥2.5 | 3 months | 140 | 0 (0%) |
| Depression | PHQ-9 | ≥5 | 6 months | 106 | 3 (2.8%) |
| Depression | PHQ-9 | ≥10 | 6 months | 106 | 0 (0%) |
| PTSD | HTQ-16 | ≥2.5 | 6 months | 103 | 0 (0%) |
| Inthaphatha et al., 2020 | Lao People's Democratic Republic | Lower MIC | Cross-sectional | Could not understand Lao language; delivered twin babies; thyroid disorders | Postpartum women | Depression | EPDS | ≥10; 9/10 | 6-8 weeks | 428 | 136  (31.8%) |
| Jin et al., 2020 | New Zealand | HIC | Cohort | Developed significant health problems; diagnosed or treated for thyroid disorders | Mothers aged 16 years and older, who had given birth to a healthy term singleton infant | Depression | EDPS | 10 or above | 3 months | 86 | 16 (18.0%) |
| Depression | EPDS | 13 or above | 3 months | 86 | 8 (9%) |
| Anxiety | EPDS-3A | 6 or above | 3 months | 86 | 10 (12%) |
| Depression | EDPS | 10 or above | 6 months | 79 | 9 (11%) |
| Depression | EPDS | 13 or above | 6 months | 79 | 4 (5%) |
| Anxiety | EPDS-3A | 6 or above | 6 months | 79 | 3 (4%) |
| Kashkouli et al., 2023 | Iran | Upper MIC | Cross-sectional | Systemic diseases; pregnancy/ delivery complications; history of psychological problems; significant economic problems; family history of depression or other mental illnesses; experiencing stressful conditions or using alcohol within 12 h before sampling; insufficient sleep / heavy physical activity the night before sampling; abnormal blood pressure during sampling or at postpartum period; instrumental vaginal delivery; congenital malformations of the newborn | Women with singleton pregnancy, Iranian nationality, good marital relationship with the spouse | Depression | EPDS | 13 or higher | 6-8 weeks | 303 | 31 (10.2%)a |
| Psychiatrist assessment | NR | 6-8 weeks | 303 | 29 (9.6%)a |
| Kassa et al., 2021 | Ethiopia | LIC | Cohort | Multiple pregnancies | Postpartum adult women | Depression | EPDS | More than or equal to 13 points | 6 weeks | 760 | (20.1%)b |
| Postpartum adolescents | Depression | EPDS | More than or equal to 13 points | 6 weeks | 374 | (37.4%)b |
| Katz et al., 2024 | United States | HIC | Experimental | Allergy to morphine; chronic pain syndromes; prior opioid use | Control group of patients with planned vaginal delivery who received labor neuraxial analgesia | Depression | EPDS | Higher than 10 | 6 weeks | 58a | 5 (8.6%) |
| Kim et al., 2023 | South Korea | HIC | Cross-sectional | NR | Women registered for the Maternal and Child Health Service | Depression | EPDS | ≥10 | 3≤ to <6 months | 432 | 162  (37.5%) |
| Labrague et al., 2019 | Philippines | Lower MIC | Cross-sectional | Infant death; infant hospitalization; history of mood/ psychotic disorders; history of serious medical condition | Women with a live birth | Depression | EPDS | Higher than 10 | 6 weeks | 165 | 27 (16.4%) |
| Laohachaiaroon et al., 2022 | Thailand | Upper MIC | Cross-sectional | Communication difficulties; inability to complete a questionnaire | Thai women | Depression | EPDS | 11 or more | 6 weeks | 260 | 27 (10.4%) |
| Latifah et al., 2024 | Indonesia | Upper MIC | Experimental | Drank alcohol or used drugs; mental disorders; hypertension; anemia; heart problems; diabetes; placenta previa; fetal abnormalities; multiple pregnancies; hydramnios; post-term pregnancy | Control group of  women who had smartphones and were Muslim | Depression | EPDS | 10 and above | 2 months | 64 | 49 (76.6%) |
| LeMasters et al., 2020 | Pakistan | Lower MIC | Cohort | NR | Postpartum women | Depression | SCID | DSM-IV | 6 months | 823d | 217 (23.1%)e |
| Li et al., 2020 | China | Upper MIC | Cross-sectional | History of major psychosis; bipolar disorder; major depression; OCD; cerebral diseases | Postpartum women aged between 18 and 45 who were native Cantonese or otherwise having lived in the study area for more than 10 years | Depression | EPDS | ≥9; 8/9 | 2 to 4 months | 522 | 90 (17.3%) |
| Liang et al., 2020 | China | Upper MIC | Cross-sectional | History or family history of psychiatric disorders | Postpartum women with Chinese nationality living in the study area during the COVID-19 period | Depression | EPDS | 10 or more | 6-12 weeks | 845 | 253 (30%) |
| Lin et al., 2019 | Taiwan | HIC | Cross-sectional | Congenital disease; multiple births; premature birth; acute infection; diagnosed with a mental disorder; smoke or drink alcohol; infants diagnosed with any diseases | Healthy postpartum women with healthy term infants | Depression | EDPS | ≥10 | 6-8 weeks | 344 | 29 (8.4%) |
| Ling et al., 2023 | China | Upper MIC | Experimental | Cesarean section; coagulation disorders; mental disorder; depression before delivery; Self-rating Anxiety Scale (SAS)≥50 or Self-rating Depression Scale (SDS)≥0.5; perineal tears or a lateral cut required during delivery; Apgar score of fetus at delivery<8; postpartum hemorrhage>500 ml; failure of epidural puncture | Control group of primiparous women with labor analgesia, aged 22 to 38, with ASA physical status II, gravida 1 para 0 labor, single, term pregnancy | Depression | EDPS | NR | 6 weeks | 59 | 11 (18.6%) |
| Lorentz et al., 2021 | Brazil | Upper MIC | Cohort | Diagnosed psychiatric disorders; illicit drugs; hospitalized in intensive care | Women 18 years of age or older delivering at 37 weeks of gestation or more, live birth | Depression | EPDS | ≥10 | 3 months | 50 | 20 (40%) |
| 6 months | 50 | 20 (40%) |
| Luciano et al., 2021 | Italy | HIC | Cohort | Severe intellectual disability; pre-existing diagnosis of a psychosis-spectrum disorder or bipolar disorder | Postpartum women | Depression | EPDS | ≥10; >10 | 3 months | 161 | 31 (19.2%) |
| 6 months | 109 | 18 (16.5%) |
| Luciano et al., 2022 | Italy | HIC | Cohort | Severe intellectual disability; pre-existing diagnosis of a psychosis-spectrum disorder or bipolar disorder | Postpartum women | Depression | EPDS | ≥10; >10 | 3 months | 162 | 22 (13.6%) |
| 6 months | 113 | 16 (14.1%) |
| Mahale et al., 2021 | India | Lower MIC | Cohort | NR other than those who did not consent | Postpartum women | Depression | EPDS | 13 and above; >13 | 6 weeks | 561 | 43 (7.7%) |
| Matsumura et al., 2019 | Japan | HIC | Cohort | Multiple registration; multiple births; miscarriage; stillbirth; inability to comprehend and complete questionnaire | Mothers with singleton live births with 16 years or more of education | Depression | EPDS | ≥9; 8/9 | 6 months | 19621 | 1768 (9%) |
| Mothers with singleton live births with 12-16 years of education (exclusive) | Depression | EPDS | ≥9; 8/9 | 6 months | 38030 | 3975 (10.5%) |
| Mothers with singleton live births with 12 or less years of education | Depression | EPDS | ≥9; 8/9 | 6 months | 32543 | 4933 (15.2%) |
| Mazzoni et al., 2020 | United States | HIC | Experimental | Type 1 diabetes; multiple gestation; major fetal anomaly; serious medical or psychiatric comorbidity | Control group of women receiving individual prenatal care, presented to the resident diabetes clinic, were English- or Spanish-speaking with type 2 or gestational diabetes | Depression | EPDS | 10 or greater; >10 | 6-12 weeks | 35 | 2 (5.7%) |
| Meky et al., 2020 | Egypt | Lower MIC | Cross-sectional | EPDS score 13 or higher during pregnancy; unable to nurse babies; baby with congenital anomalies or other medical problems; stillbirth; instrumental vaginal delivery; no current/ past pregnancy medical or psychological  problems; unable to read or understand Arabic | Women who gave birth to singleton via NVD | Depression | EPDS | 13 or more | 8 weeks | 191 | 14 (7%) |
| Women who gave birth to singleton via elective CS | Depression | EPDS | 13 or more | 8 weeks | 71 | 15 (21%) |
| Women who gave birth to singleton via emergency CS | Depression | EPDS | 13 or more | 8 weeks | 108 | 27 (25%) |
| Women who gave birth to singleton via NVD | Depression | EPDS | 13 or more | 16 weeks | 170 | 3 (1.7%) |
| Women who gave birth to singleton via elective CS | Depression | EPDS | 13 or more | 16 weeks | 68 | 9 (13%) |
| Women who gave birth to singleton via emergency CS | Depression | EPDS | 13 or more | 16 weeks | 102 | 19 (19%) |
| Miller et al., 2021 | United States | HIC | Cohort | Previous IV magnesium during pregnancy; intrauterine fetal demise; non-English primary language; chronic hypertension; eclampsia before being approached; multiple gestation | Women 18 years or older with a diagnosis of a hypertensive disorder of pregnancy, received no magnesium | Depression | QIDS | ≥6 | 6 weeks | 266c | 73 (45.6%) |
| Women 18 years or older with a diagnosis of a hypertensive disorder of pregnancy, received magnesium | Depression | QIDS | ≥6 | 6 weeks | 266c | 44 (46.3%) |
| Women 18 years or older with a diagnosis of a hypertensive disorder of pregnancy, received no magnesium | Depression | QIDS | ≥11 | 6 weeks | 266c | 9 (5.6%) |
| Women 18 years or older with a diagnosis of a hypertensive disorder of pregnancy, received magnesium | Depression | QIDS | ≥11 | 6 weeks | 266c | 3 (3.2%) |
| Mmasa et al., 2024 | Botswana | Upper MIC | Cohort | NR | Postpartum women who were HIV-seronegative | Depression | EPDS | ≥10 or thoughts of self-harm | 2 months | 119 | 6 (5%) |
| ≥13 or thoughts of self-harm | 2 months | 119 | 4 (3.4%) |
| ≥10 or thoughts of self-harm | 6 months | 119 | 1 (0.8%) |
| ≥13 or thoughts of self-harm | 6 months | 119 | 0 (0%) |
| Munro et al., 2021 | Canada | HIC | Cohort | Self-reported major medical or psychiatric illness not well-managed | Women older than 18 years old, nulliparous with an uncomplicated, singleton pregnancy, fluent in English | Depression | EPDS | 13 or higher | 3 months | 686 | (6.4%)b |
| 6 months | 647 | (6.5%)b |
| Nakamura et al., 2020 | France | HIC | Cohort | Planning to  move out of the study area | Mothers in couples in which both parents depressed or in which only the mother is depressed, 18 years old and older and able to consent for  the study in French, English, Arab or Turkish | Depression | EPDS | ≥12 | 2 months | 12386 | 1405a (11.3%)a |
| Navarrete et al., 2021 | Mexico | Upper MIC | Cohort | Have a bipolar condition | Postpartum women 20 years old or older | Depression | EPDS | Greater than 10 | 6 months | 210 | 42 (20%) |
| Anxiety | Anxiety subscale of SCL-90 | Greater than 18 | 6 months | 210 | 35 (16.7%) |
| Nulty et al., 2022 | United States | HIC | Cohort | Premature birth; extended mother or infant hospital stay post-birth; low birthweight; multiple birth; congenital anomaly/ condition affecting infant feeding or growth | Non-Hispanic Black mothers 18-39 years old, English speaking | Depression | CES-D | At or above 16 | 3 months | 252 | 33 (14.5%) |
| 6 months | 230 | 36 (17.7%) |
| Osnes et al., 2020 | Norway | HIC | Cohort | Younger than 18; unable to answer questionnaire in Norwegian | Postpartum women who underwent routine ultrasound examination at 17 weeks gestation | OCD | MINI | DSM-IV-TR | 8 weeks | 530 | 34 (6.4%) |
| Ping et al., 2023 | China | Upper MIC | Cohort | History of psychiatric disorders; heart, lung and other organ dysfunction; difficulty cooperating in data collection; high surgical risk; intraoperative adverse effects | Elective cesarean section patients ASA II, age 18 years or older, lumbar anesthesia | Depression | EPDS | ≥10; 9/10 | 42 days | 362 | 61 (16.9%) |
| Priya et al., 2024 | India | Lower MIC | Cross-sectional | Psychiatric/ neurological disorder; fetal/neonatal death | Women attending a postpartum clinic | Depression | EPDS | ≥10 | 6 weeks | 426 | 74 (17.4%) |
| Rahimi et al., 2024 | Iran | Upper MIC | Cross-sectional | History of infertility; acute physical or psychological illness | Literate Iranian mothers with fullterm and singleton pregnancy delivered with NVD, healthy baby | Depression | EPDS | Above 10 | 6-8 weeks | 162 | (29.6%)b |
| Roberts et al., 2022 | Australia | HIC | Cohort | Diabetes, hypertension, renal or other serious maternal disease prior to pregnancy; multiple pregnancy; baby born with a congenital anomaly | English-speaking, postpartum women who were normotensive | Depression | EPDS | Greater than 12 | 6 months | 302 | 7 (2%) |
| English-speaking, postpartum women who were normotensive | Anxiety | GAD-7 | 10 or greater | 6 months | 302 | 9 (3%) |
| English-speaking, postpartum women who were normotensive | PTSD | PDS or PDS-5 | Meeting every criteria A-F for the PDS or 29 or higher on the PDS-5 | 6 months | 302 | 5 (2%) |
| English-speaking, postpartum women who had preeclampsia | Depression | EPDS | Greater than 12 | 6 months | 90 | 6 (7%) |
| English-speaking, postpartum women who had preeclampsia | Anxiety | GAD-7 | 10 or greater | 6 months | 90 | 6 (7%) |
| English-speaking, postpartum women who had preeclampsia | PTSD | PDS or PDS-5 | Meeting every criteria A-F for the PDS or 29 or higher on the PDS-5 | 6 months | 90 | 2 (2%) |
| Ross et al., 2021 | United States | HIC | Cohort | Fetal demise; contraindication to estonogestrel (ENG) implant | Women age 18 years or older, English-speaking, who received the ENG-implant | Depression | PHQ-9 | ≥10 | 6 weeks | 31 | 2 (6.5%) |
| Women age 18 years or older, English-speaking, who did not receive the ENG-implant | Depression | PHQ-9 | ≥10 | 6 weeks | 34 | 2 (5.9%) |
| Women age 18 years or older, English-speaking, who received the ENG-implant | Depression | PHQ-9 | ≥10 | 3 months | 27 | 3 (11.1%) |
| Women age 18 years or older, English-speaking, who did not receive the ENG-implant | Depression | PHQ-9 | ≥10 | 3 months | 32 | 3 (9.4%) |
| Ross et al., 2023 | United States | HIC | Cohort | No chosen method of contraception in the electronic health record | Women of at least 18 years of age without DMPA | Depression | PHQ-9 | 10 or gerater | 6 weeks | 4663 | (6.0%)b |
| Women of at least 18 years of age with DMPA | Depression | PHQ-9 | 10 or gerater | 6 weeks | 410 | (5.4%)b |
| Rosseland et al., 2020 | Norway | HIC | Cohort | Non-Norwegian-speaking | Postpartum women | Depression | EPDS | 10 or more | 8 weeks | 2217 | 264 (12%) |
| Shen et al., 2023 | China | Upper MIC | Cross-sectional | NR | Women with singleton pregnancies, 18–45 years old, good understanding of written and spoken Chinese | Depression | EPDS | ≥9 | 42 days | 1551 | 265 (17.1%) |
| PHQ-9 | ≥5 | 42 days | 1551 | 385 (24.8%) |
| Skalkidou et al., 2019 | Sweden | HIC | Cohort | Inability to communicate in Swedish; major malformations or miscarriages | Postpartum women over the age of 18 years | Depression | EPDS | At or above 12 | 6 weeks | 1629 | 188 (11.5%) |
| 6 months | 1629 | 155 (9.5%) |
| Sun et al., 2020 | China | Upper MIC | Cohort | Contraindications to epidural labor analgesia; non-vertex presentation; 34 weeks or less gestation, not eligible for TOLAC | Multiparas with singleton fetus, epidural analgesia provided | Depression | EPDS | ≥10 | 42 days | 258 | 17 (6.6%) |
| Multiparas with singleton fetus, no epidural analgesia provided | Depression | EPDS | ≥10 | 42 days | 159 | 40 (25.2%) |
| Takács et al., 2019 | Czech Republic | HIC | Cohort | Multiple pregnancy | Mothers with synthetic oxytocin received intrapartum | Depression | EPDS | >12 | 6 weeks | 106a | 21 (20%) |
| Mothers without synthetic oxytocin received intrapartum | Depression | EPDS | >12 | 6 weeks | 320a | 83 (25.9%) |
| Tan et al., 2024 | Singapore | HIC | Experimental | Non-cephalic fetal presentation; poorly controlled obstetric or medical conditions; elective caesarean delivery | Control group of English-speaking women aged 21–50 years, ASA physical status 2, nulliparous or multiparous, with a singleton fetus ≥ 36 weeks gestation | Depression | EPDS | ≥13 | 6-10 weeks | 384 | 65 (16.9%) |
| Tong et al., 2022 | China | Upper MIC | Cohort | Younger than 18; history of psychiatric diseases; ≥10 on the EPDS prior to study commencement; contraindications for labor epidural analgesia; cesarean section | Nulliparous women with term singleton cephalic pregnancy delivering vaginally, primary school education or above, able to understand data collection measures | Depression | EPDS | ≥10 | 6 weeks | 655 | 124 (18.9%) |
| Vargas-Terrones et al., 2018 | Spain | HIC | Experimental | Age <18 or >45 years; cardiovascular, respiratory or systemic disorders; persistent bleeding; placenta previa; risk of premature labor; pregnancy-induced hypertension; pre-eclampsia; incompetent cervix | Control group of  healthy women with a singleton pregnancy | Depression | CES-D | ≥16 | 6 weeks | 47 | 14 (29.8%) |
| Wang et al., 2022 | China | Upper MIC | Experimental | Mental disorder; improper position of infant; pregnancy complications; functional organ insufficiency; change in anesthesia mode; block level higher than T4 or too low; duration of operation more than 2 hours; intraoperative bleeding more than 500mL | Control group of full-term maternity patients with ASA physical status II, aged 22 to 35 years old, undergoing general anesthesia for elective surgical procedures | Depression | EPDS | NR | 6 weeks | 39 | 14 (35.9%) |
| Wang, Hou, et al., 2023 | China | Upper MIC | Cohort | Patient moved | Postpartum women | Depression | EPDS | 10 | 6-7 weeks | 1285 | (11.4%)b |
| 3-4 months | 1090 | (11.5%)b |
| Wang, Ling, et al., 2023 | China | Upper MIC | Experimental | Mental disorder; improper position of infant; pregnancy complications; functional organ insufficiency; change in anesthesia mode; block level higher than T4 or too low; duration of operation more than 2 hours; intraoperative bleeding more than 500mL; additional procedures added to operation | Control group of  primiparous women undergoing elective cesarean section, single term pregnancy, ASA physical status II, age 24 to 36, body mass index 24 to 30kg/m2 | Depression | Clinical interview | DSM-IV | 6 weeks | 57 | 11 (19.3%) |
| Xiong & Deng, 2020 | China | Upper MIC | Cross-sectional | History or family history of psychiatric disease | Female immigrants to the region between 18 and 49 years old of Chinese nationality | Depression | EPDS | ≥10 | 6 weeks | 1230 | 418 (34%) |
| Yu et al., 2019 | China | Upper MIC | Experimental | History of bipolar or psychotic disorder; suicidal; allergic to a2-AR agonists; estimated intraoperative blood loss greater than 800 ml; cardiac abnormalities; hypotension; drug and/or alcohol abuse; taking another a2-AR agonist or antagonist | Control group of patients least 18 years of age, ASA class II, with the ability to communicate | Depression | EPDS | 10 or higher | 42 days | 276 | 45 (16.3%) |
| Zarghami et al., 2019 | Iran | Upper MIC | Cohort | Women under pharmacological treatment for psychiatric problems | Literate women ages 16-45 in urban areas | Depression | EPDS | ≥12; more than 12 | 12 weeks | 1012 | 203 (20.1%) |
| Literate women ages 16-45 in rural areas | Depression | EPDS | ≥12; more than 12 | 12 weeks | 970 | 173 (17.8%) |
| Zejnullahu et al., 2021 | Kosovo | Upper MIC | Cohort | Illiterate; history of psychiatric disorder; high-risk pregnancy; multiple gestation; fetal anomalies | Woman ages 16–45 with normal, singleton, term pregnancy to a live infant | Depression | EPDS | ≥12 | 12 weeks | 247 | (21%)b |

a Deduced from available data

b n not provided

c The reported sample size is the total sample reported but does not apply to all the measurements

d The first three measurements (8, 10, and 20 weeks) were point prevalence rates; the following four measurements (8, 12, 16 weeks and 6 months) were incidence rates; the following two measurements (8.8 and 13 weeks) were period prevalence rates

e N and n were reported as unweighted statistics while the rate presented in the study was weighted because of unequal probabilities of participant selection based on prenatal PHQ-9 scores
